# Supplementary material for: Fabrication of noncovalently functionalized brick-like β-cyclodextrins/graphene composite dispersions with favorable stability
Source: Royal Society of Chemistry journal article supplement (doi:10.1039/c3ra45666h), 2013-11-27
Supplement: c3ra45666h.pdf [file c3ra45666h.pdf]

## Electronic Supplementary Information

**Table S1.** Energies of the  $\beta$ -CD molecule, graphene, and  $\beta$ -CD/graphene composites (in kcal mol<sup>-1</sup>).

| Configurations | Valence energy | Non-bond energy |                  |               | Total enthalpy |
|----------------|----------------|-----------------|------------------|---------------|----------------|
|                |                | Hydrogen bond   | van der Waals    | Electrostatic |                |
| $\beta$ -CD    | 108.2890       | 0.000           | <b>102.07800</b> | 0.000         | 210.36706      |
| p-GE           | 3737.558       | 0.000           | <b>10026.131</b> | 0.000         | 13763.689      |
| d-GE           | 3714.623       | 0.000           | <b>10174.298</b> | 0.000         | 13888.921      |
| p-GE-CD head   | 3850.307       | 0.000           | <b>10068.935</b> | 0.000         | 13919.242      |
| p-GE-CD tail   | 3851.073       | 0.000           | <b>10086.888</b> | 0.000         | 13937.962      |
| d-GE-CD head   | 3833.963       | 0.000           | <b>10213.000</b> | 0.000         | 14045.741      |
| d-GE-CD tail   | 3829.926       | 0.000           | <b>10219.600</b> | 0.000         | 14049.524      |
| Binding energy |                |                 |                  |               |                |
| p-GE-CD head   | 4.460          | 0.000           | <b>-59.274</b>   | 0.000         | -54.8142       |
| p-GE-CD tail   | 5.226          | 0.000           | <b>-41.321</b>   | 0.000         | -36.0942       |
| d-GE-CD head   | 11.051         | 0.000           | <b>-64.599</b>   | 0.000         | -53.5471       |
| d-GE-CD tail   | 7.014          | 0.000           | <b>-56.776</b>   | 0.000         | -49.7641       |

$$E_{\text{Binding energy}} = E_{\beta\text{-CD/graphene}} - (E_{\text{graphene}} + E_{\beta\text{-CD}}).$$

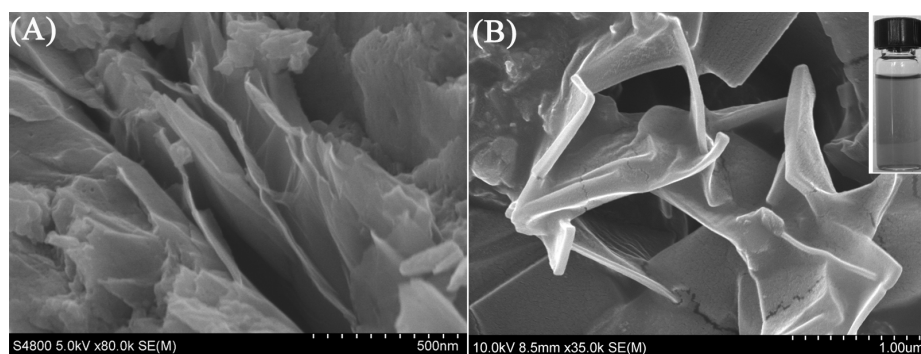

**Figure S1.** The SEM images of reduced graphene oxide before (A) and after (B) noncovalently functionalized of  $\beta$ -cyclodextrins. The inset of B is the photo of its aqueous dispersion. ( $c = 0.1 \text{ mg mL}^{-1}$ )

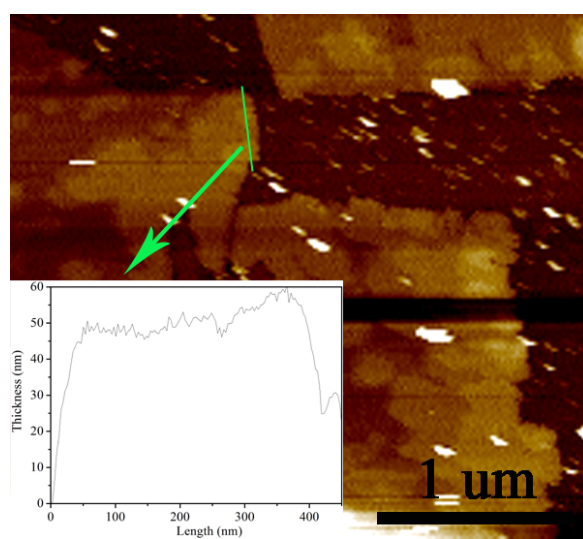

**Figure S2.** AFM image and the corresponding thickness distribution (inset).

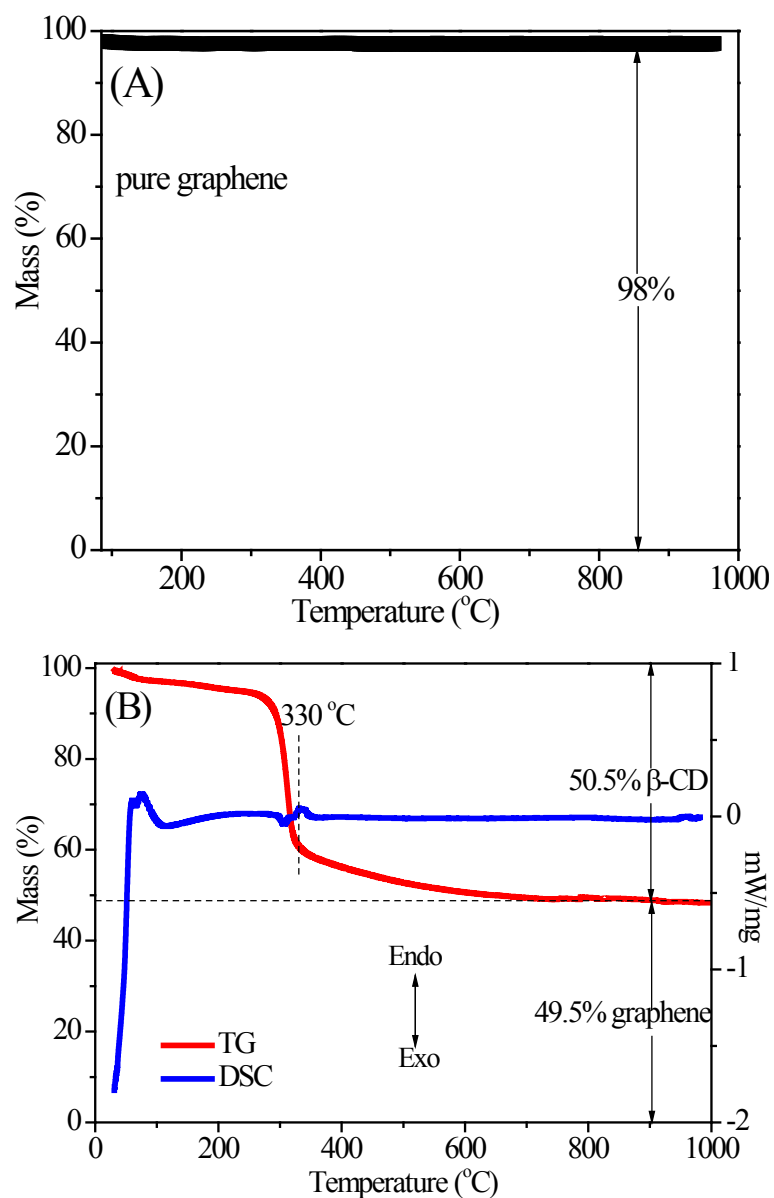

**Figure S3.** TG curves of pure graphene (A) and sample b (B).

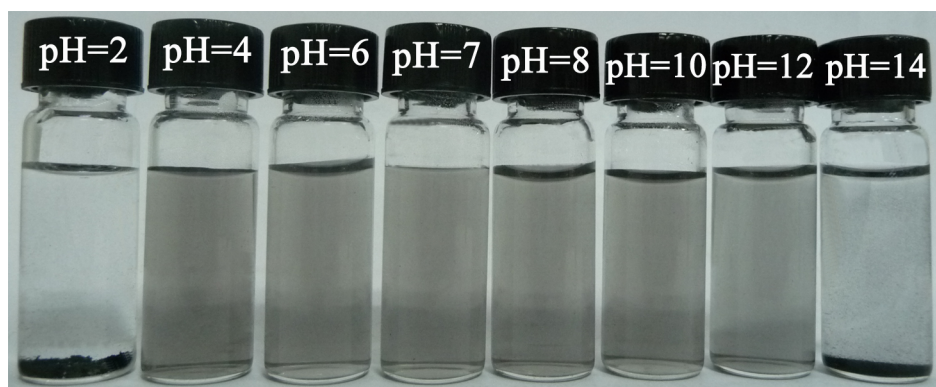

**Figure S4.** Optical micrographs of the dispersibility of β-CD/graphene composites dispersed in H<sub>2</sub>O at pH values from 2 to 14. ( $c = 0.1 \text{ mg mL}^{-1}$ )
